# Supplementary material for: Origins of the enhanced affinity of RNA–protein interactions triggered by RNA phosphorodithioate backbone modification
Source: Royal Society of Chemistry journal article supplement (doi:10.1039/c7cc05722a), 2017-01-01
Supplement: c7cc05722a1.pdf [file c7cc05722a1.pdf]

## ELECTRONIC SUPPLEMENTARY INFORMATION

### Origins of the enhanced affinity of RNA-protein interactions triggered by RNA phosphorodithioate backbone modification<sup>‡</sup>

Xianbin Yang,<sup>\*a</sup> N. Dinuka Abeydeera,<sup>a</sup> Feng-Wu Liu<sup>b</sup> and Martin Egli<sup>\*c</sup>

<sup>a</sup>AM Biotechnologies, LLC, 12521 Gulf Freeway, Houston, Texas 77034, USA

<sup>b</sup>School of Pharmaceutical Sciences, Zhengzhou University, Science Avenue 100, Zhengzhou 450001, Henan, China

<sup>c</sup>Department of Biochemistry, Vanderbilt University, School of Medicine, Nashville, TN 37232, USA

#### Materials.

5'-DMT-2'-O-TBDMS nucleoside (A<sup>Bz</sup>, C<sup>Ac</sup>, G<sup>iBu</sup>, and U) phosphoramidite monomers and 5'-DMT-2'-O-methyl nucleoside (A<sup>Bz</sup>, C<sup>Ac</sup>, G<sup>iBu</sup>, and U) phosphoramidite monomers were purchased from Hongene Biotechnology USA, Inc. The biotinTEG phosphoramidite was purchased from Glen Research. The bacteriophage 6X HIS-Tag MS2 phage coat protein with V75E; A81G mutant (sequence below) (MW: 13744.4609) was obtained from GenScript USA, Inc.

Protein sequence:

|                                                                   |     |
|-------------------------------------------------------------------|-----|
| ASNFTQFVLV DNGGTGDVTV APSNFANGVA EWISSNSRSQ AYKVTCSVRQ SSAQNRKYTI | 60  |
| KVEVPKVATQ TVGGEELPVA GWRSYLNMEL TIPIFATNSD CELIVKAMQG LLKDGNPIPS | 120 |
| AIAANSIGY                                                         | 129 |

These proteins were handled according to manufacturers' recommendations and aliquots were stored at -80 °C. All other chemicals and buffer components were obtained from Sigma-Aldrich. All solutions for *in vitro* assays and purifications were made using deionized/diethylpyrocarbonate (DEPC) treated water filtered through a 0.22 µm filter (Millipore).

#### RNA and modified RNA synthesis.

Modified and unmodified RNAs were synthesized on the 1 µmole scale on an Expedite 8909 DNA/RNA Synthesizer using commercially available monomers as well as in house produced 5'-DMT-2'-O-TBDMS nucleoside (A<sup>Bz</sup>, C<sup>Ac</sup>, G<sup>iBu</sup>, and U) thiophosphoramidite monomers or 5'-DMT-2'-O-methyl nucleoside (A<sup>Bz</sup>, C<sup>Ac</sup>, G<sup>iBu</sup>, and U) thiophosphoramidite monomers (1,2). For binding assays leading to affinity ranking, the RNAs were biotinylated at their 5'-end using BiotinTEG (Glen Research), allowing immobilization onto a streptavidin (SA) coated sensor surface (this step enables kinetic characterization of crude RNA binding to proteins on a forteBIO Octet Red96 instrument). After completion of the synthesis, the solid support was suspended in ammonium hydroxide/methylamine (AMA) solution (prepared by mixing 1 volume of ammonium hydroxide (28%) with 1 volume of 40% aqueous methylamine) and heated at 65 °C for 15 min to release the product from the support and to complete the removal of all protecting groups except the

TBDMS group at the 2'-position. The solid support was filtered, and the filtrate was concentrated to dryness. For 2'-O-TBDMS RNA, the obtained residue was re-suspended in 115  $\mu$ L of anhydrous DMF and then heated for 5 min at 65  $^{\circ}$ C to dissolve the crude product. Triethylamine (TEA, 60  $\mu$ L) was added to each solution, and the solutions were mixed gently. TEA  $\cdot$  3HF (75  $\mu$ L) was added to each solution, and the tubes were then sealed tightly and incubated at 65  $^{\circ}$ C for 2.5 h. The reaction was quenched with 1.75 mL of DEPC-treated water. Following deprotections, the oligonucleotides were desalted/buffer exchanged into DEPC-treated H<sub>2</sub>O (using 3000 MWCO Amicon filters) and lyophilized to dryness. The mass of the modified RNAs were confirmed by ESI-MS.

**Supplementary Table 1 (ST-1) : The RNA sequences for MS2 coat protein with PS2 substitutions.** Each RNA sequence AF147-1 and AF151-2 to AF151-19 and AF151UB (2'-OMe-PS2 modified) is labeled with Biotin at the 5'-end using the BiotinTEG phosphoramidite (Glen Research). AF147-1 is the known RNA sequence that binds to MS2-mutant coat protein. The sequences, AF151-2 to AF151-19 are synthesized by systematically substituting PS2 onto each residue (red).

| #  | Modified sequence information                   | RNA-ID   | Phosphate # |
|----|-------------------------------------------------|----------|-------------|
| 1  | 5'-ACA UGA GGA UUA CCC AUG U-3'                 | AF147-1  |             |
| 2  | 5'-A <sub>ps2</sub> CA UGA GGA UUA CCC AUG U-3' | AF151-2  | P4          |
| 3  | 5'-A <sub>Cps2</sub> A UGA GGA UUA CCC AUG U-3' | AF151-3  | P5          |
| 4  | 5'-ACA <sub>Aps2</sub> UGA GGA UUA CCC AUG U-3' | AF151-4  | P6          |
| 5  | 5'-ACA <sub>Ups2</sub> GA GGA UUA CCC AUG U-3'  | AF151-5  | P7          |
| 6  | 5'-ACA U <sub>Gps2</sub> A GGA UUA CCC AUG U-3' | AF151-6  | P8          |
| 7  | 5'-ACA UGA <sub>Aps2</sub> GGA UUA CCC AUG U-3' | AF151-7  | P9          |
| 8  | 5'-ACA UGA <sub>Gps2</sub> GA UUA CCC AUG U-3'  | AF151-8  | P10         |
| 9  | 5'-ACA UGA <sub>Gps2</sub> A UUA CCC AUG U-3'   | AF151-9  | P11         |
| 10 | 5'-ACA UGA GGA <sub>Aps2</sub> UUA CCC AUG U-3' | AF151-10 | P12         |
| 11 | 5'-ACA UGA GGA <sub>Ups2</sub> UA CCC AUG U-3'  | AF151-11 | P13         |
| 12 | 5'-ACA UGA GGA UU <sub>ps2</sub> A CCC AUG U-3' | AF151-12 | P14         |
| 13 | 5'-ACA UGA GGA UUA <sub>Aps2</sub> CCC AUG U-3' | AF151-13 | P15         |
| 14 | 5'-ACA UGA GGA UUA <sub>Cps2</sub> CC AUG U-3'  | AF151-14 | P16         |
| 15 | 5'-ACA UGA GGA UUA CC <sub>ps2</sub> C AUG U-3' | AF151-15 | P17         |
| 16 | 5'-ACA UGA GGA UUA CCC <sub>ps2</sub> AUG U-3'  | AF151-16 | P18         |
| 17 | 5'-ACA UGA GGA UUA CCC <sub>Aps2</sub> UG U-3'  | AF151-17 | P19         |
| 18 | 5'-ACA UGA GGA UUA CCC AU <sub>ps2</sub> G U-3' | AF151-18 | P20         |
| 19 | 5'-ACA UGA GGA UUA CCC AUG <sub>ps2</sub> U-3'  | AF151-19 | P21         |
| 20 | 5'-ACA UGA GGA UU <sub>Ms2</sub> A CCC AUG U-3' | AF151UB  | P14         |

**Supplementary Table 2 (ST-2) : Affinity ranking of the RNA sequences (with PS2 substitutions) for MS2 coat-protein (3).** The RNA immobilization onto streptavidin-coated sensors was achieved by dipping into 250 nM RNA solution for 1 min at a stir rate of 1,000 rpm. When low affinities are observed (AF151-3, AF151-10, and AF151-12), those samples were purified and confirmed by mass spectrometry. The immobilization of purified RNA was achieved by dipping into a solution of 50 nM pure-RNA for 1 min at a stir rate of 1,000 rpm. A stock of 50.0 nM MS2-mutant in MKMTB buffer (100 mM MES·Na<sup>+</sup> pH 6.2, 10 mM MgCl<sub>2</sub>, 80 mM KCl, 0.05% Tween 20, 0.01 mg/mL BSA) was prepared as a dilution series (0, 1.0, 2.0, 3.0, 4.0, 6.0 nM). Association was monitored for 300 sec and the dissociation was followed for 300 sec on a FortéBIO Octet Red 96 instrument. When it was necessary, the dissociation was stretched to at least 900 sec to verify tight binding. The data were fit to a 1:1 binding model using fortéBIO Octet data analysis software. Kinetic constants were determined by integration of the experimental data using the differential rate equation  $dR/dt = k_{on} \cdot C \cdot (R_{max} - R) - k_{off} \cdot R$  to obtain both the  $k_a$  and  $k_d$  values ( $R$  = observed response,  $R_{max}$  = maximum response upon saturation,  $C$  = analyte concentration,  $k_{on}$  = association rate constant,  $k_{off}$  = dissociation rate constant). The ratio between  $k_{off}$  and  $k_{on}$  corresponds to the reported dissociation constants ( $k_{off}/k_{on} = K_D$ ). The goodness of the global fits was judged by the reduced  $\chi^2$  and  $R^2$  values. Relative  $K_D$  values are obtained as the ratio of  $K_D$  of the unmodified RNA and that of the modified one (Relative  $K_D = K_{D \text{ unsubstituted}}/K_{D \text{ substituted}}$ ).

| RNA- ID  | Phosphate # | KD (M)   | KD Error | kon(1/Ms) | kon Error | kdis(1/s) | kdis Error | Full $\chi^2$ | Full $R^2$ |
|----------|-------------|----------|----------|-----------|-----------|-----------|------------|---------------|------------|
| AF147-1  |             | 1.54E-09 | 3.72E-11 | 2.46E+05  | 5.58E+03  | 3.79E-04  | 3.14E-06   | 0.052         | 0.997      |
| AF151-2  | P4          | 1.53E-09 | 4.74E-11 | 2.83E+05  | 7.33E+03  | 4.33E-04  | 7.29E-06   | 0.025         | 0.997      |
| AF151-3  | P5          | 2.86E-11 | 1.44E-12 | 6.11E+06  | 1.81E+05  | 1.75E-04  | 7.09E-06   | 0.026         | 0.998      |
| AF151-4  | P6          | 8.76E-10 | 1.85E-11 | 5.83E+05  | 8.30E+03  | 5.10E-04  | 7.96E-06   | 0.021         | 0.996      |
| AF151-5  | P7          | 1.56E-09 | 3.21E-11 | 5.53E+05  | 9.60E+03  | 8.60E-04  | 9.54E-06   | 0.031         | 0.995      |
| AF151-6  | P8          | 1.78E-09 | 3.92E-11 | 6.64E+05  | 1.27E+04  | 1.19E-03  | 1.28E-05   | 0.032         | 0.991      |
| AF151-7  | P9          | 1.68E-09 | 3.43E-11 | 3.09E+05  | 5.46E+03  | 5.18E-04  | 5.33E-06   | 0.031         | 0.998      |
| AF151-8  | P10         | 1.32E-09 | 2.16E-11 | 6.08E+05  | 8.01E+03  | 8.03E-04  | 7.72E-06   | 0.037         | 0.996      |
| AF151-9  | P11         | 1.12E-09 | 1.95E-11 | 5.64E+05  | 7.44E+03  | 6.33E-04  | 7.20E-06   | 0.027         | 0.997      |
| AF151-10 | P12         | 9.82E-11 | 1.30E-11 | 2.49E+05  | 3.33E+03  | 2.44E-05  | 3.22E-06   | 0.015         | 0.999      |
| AF151-11 | P13         | 1.42E-09 | 2.71E-11 | 9.40E+05  | 1.50E+04  | 1.33E-03  | 1.39E-05   | 0.038         | 0.988      |
| AF151-12 | P14         | 2.18E-11 | 1.62E-12 | 7.23E+06  | 3.23E+05  | 1.58E-04  | 9.34E-06   | 0.072         | 0.997      |
| AF151-13 | P15         | 3.21E-09 | 8.26E-11 | 4.00E+05  | 9.78E+03  | 1.29E-03  | 1.04E-05   | 0.032         | 0.994      |
| AF151-14 | P16         | 6.14E-10 | 1.34E-11 | 2.83E+06  | 4.89E+04  | 1.74E-03  | 2.33E-05   | 0.009         | 0.967      |
| AF151-15 | P17         | 8.55E-10 | 1.45E-11 | 1.80E+06  | 2.35E+04  | 1.54E-03  | 1.67E-05   | 0.009         | 0.983      |
| AF151-16 | P18         | 2.15E-09 | 3.75E-11 | 1.25E+06  | 2.00E+04  | 2.69E-03  | 1.87E-05   | 0.017         | 0.983      |
| AF151-17 | P19         | 1.77E-09 | 3.19E-11 | 4.45E+05  | 6.96E+03  | 7.87E-04  | 7.07E-06   | 0.012         | 0.997      |
| AF151-18 | P20         | 2.51E-09 | 8.20E-11 | 3.24E+05  | 9.78E+03  | 8.11E-04  | 1.02E-05   | 0.028         | 0.994      |
| AF151-19 | P21         | 1.52E-09 | 3.28E-11 | 3.37E+05  | 6.05E+03  | 5.13E-04  | 6.17E-06   | 0.015         | 0.998      |
| AF151UB  | P14         | 3.77E-09 | 5.88E-11 | 5.57E+05  | 8.34E+03  | 2.10E-03  | 9.18E-06   | 0.020         | 0.996      |

**Supplementary Figure 1 (SF-1): BLI analysis of the RNA sequences (with PS2 substitutions) for MS2-coat-protein.** The sequences used in this analysis are shown in **Supplementary Table 1** and the kinetic parameters corresponding to the global fits are given in **Supplementary Table 2**. Association was

monitored for 300 sec and the dissociation was followed for 300 sec on a FortéBio Octet Red 96 instrument. When it was necessary, the dissociation was stretched to at least 900 sec to verify tight binding. The data were fit to a 1:1 binding model using FortéBio Octet data analysis software.

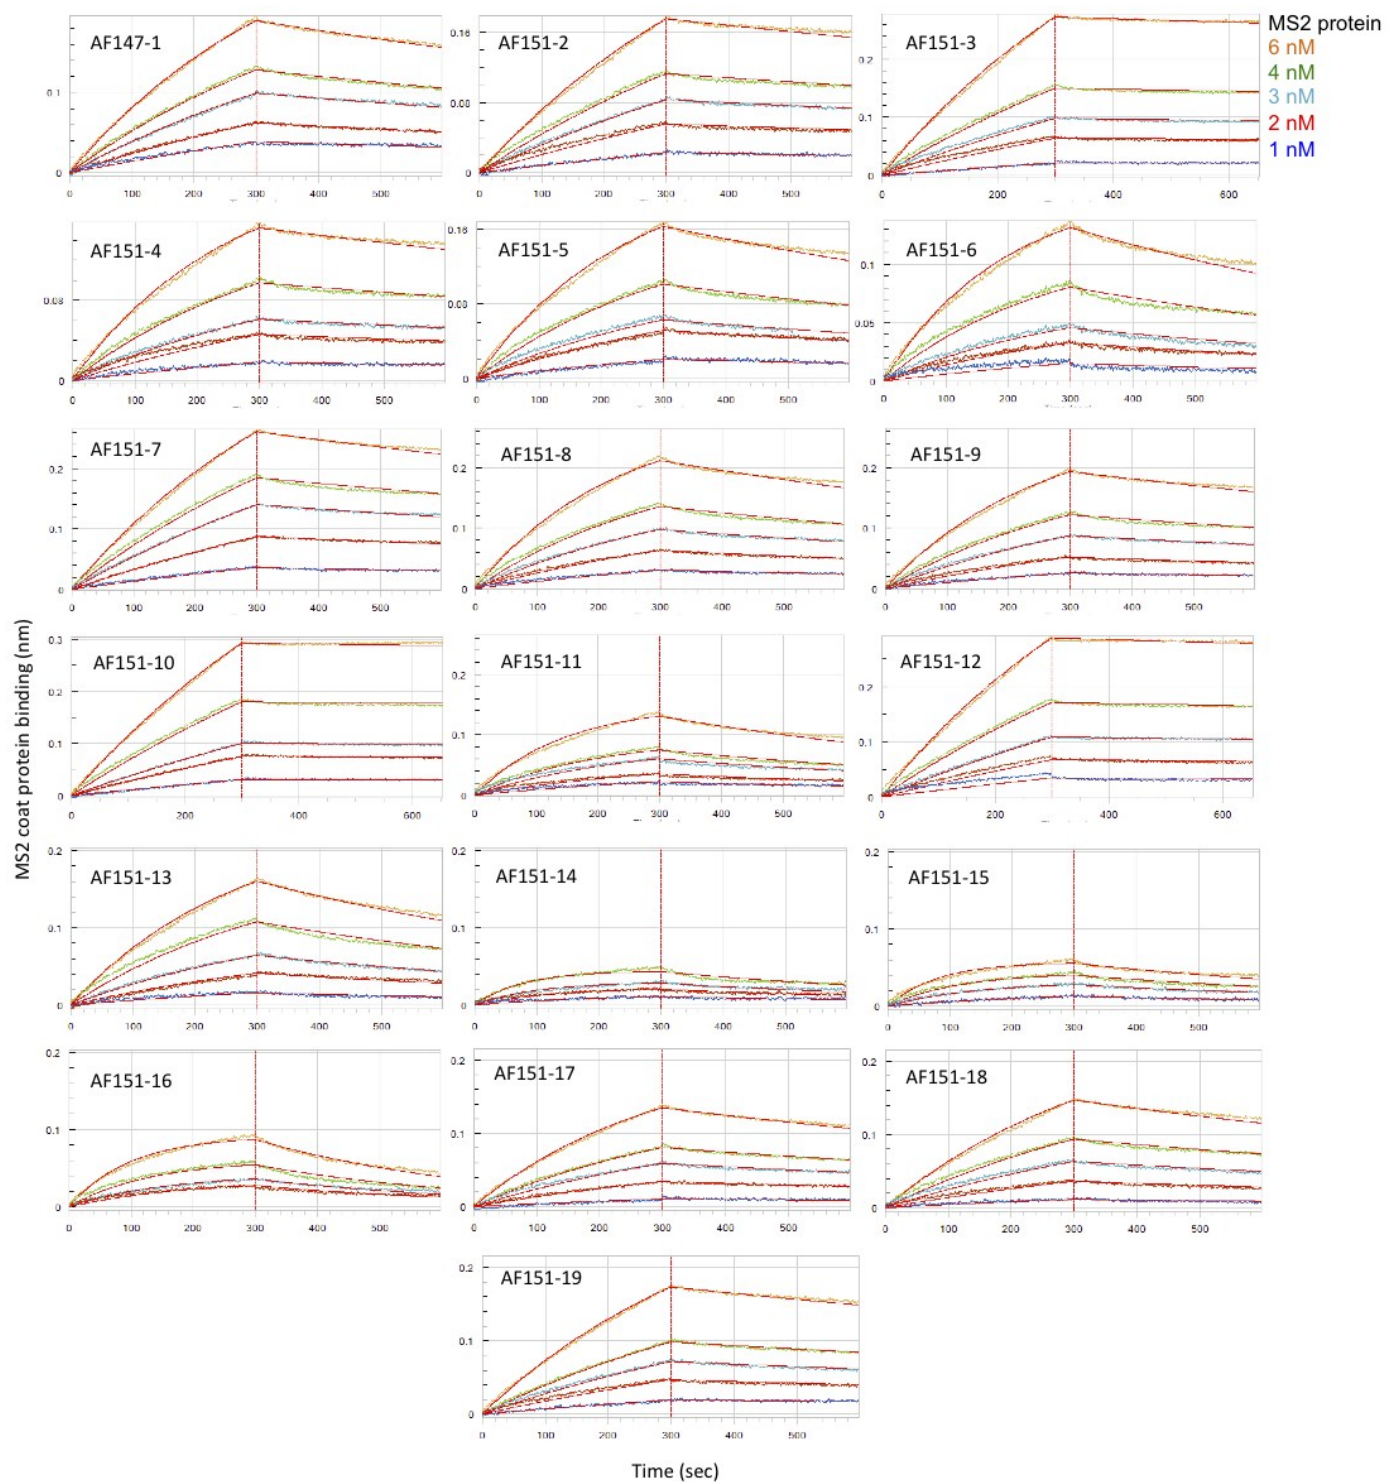



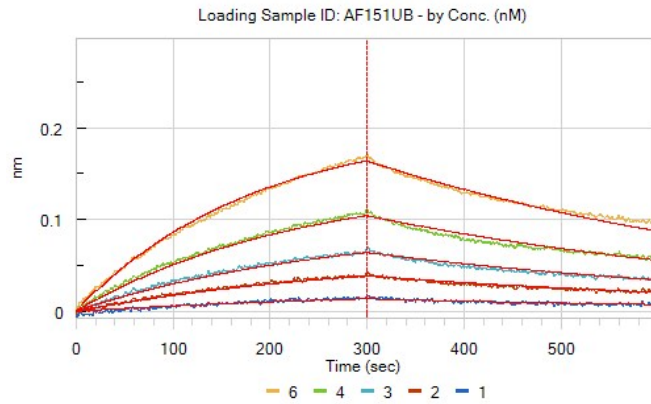

**Supplementary Figure 2 (SF-2).** Structure of the MS2 phage coat protein-RNA complex [PDB 1zdh] (Valegård et al, 1997). (A) Overall view of the icosahedral capsid. Protein and RNA are shown in ribbon mode and RNA bases are highlighted as blue boxes. (B) – (D) The capsid viewed along one of the 6-fold, 5-fold and 3-fold axes, respectively. Symbols indicating the rotation axes are shown in green. (E) View from inside the capsid with one RNA hairpin shown in space-filling mode and the various rotational symmetries clearly visible.

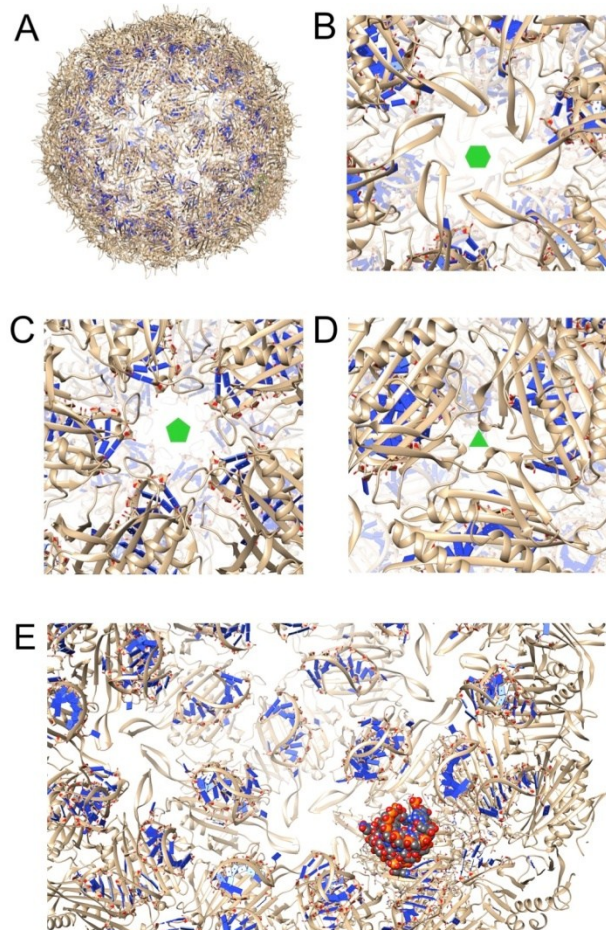

**Supplementary Figure 3 (SF-3).** Overall view of interactions between MS2 coat protein (beige ribbon) and RNA hairpin (gray carbons). Points of contact that result in enhanced affinity upon PS2 modification are limited to the base of the stem (P5) and the loop region (P12, P14). P5, P12 and P14 are highlighted as filled circles in yellow along with selected side chains. Rose- and cyan-colored spheres indicate the pro-Rp and -Sp sulfurs, respectively, and calculated positions of 2'-OMe carbon atoms are light green.

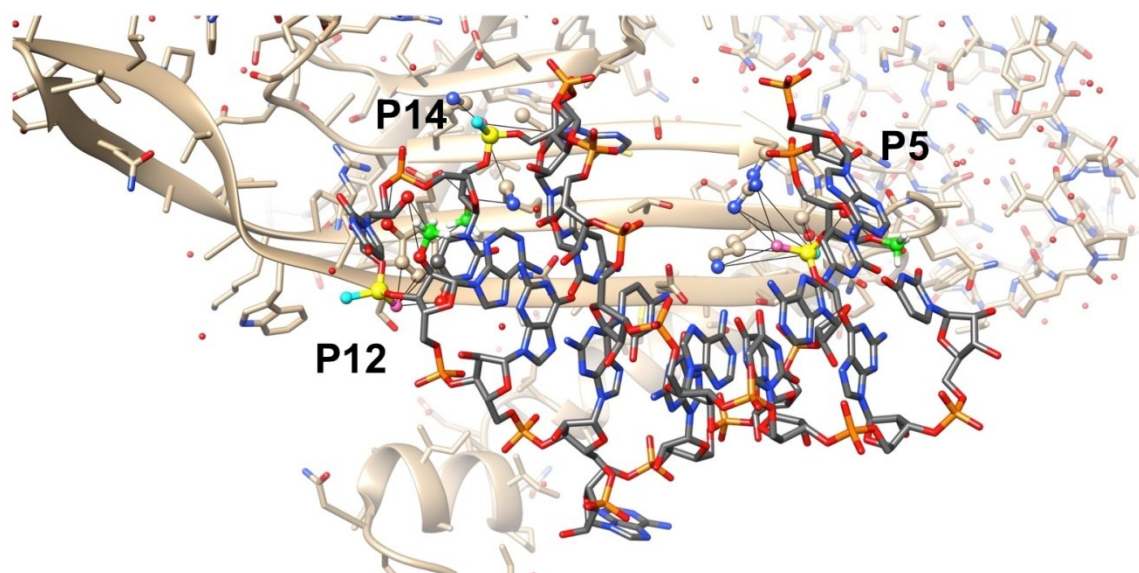

## References

1. Wu, S.Y., Yang, X., Gharpure, K.M., Hatakeyama, H., Egli, M., McGuire, M.H., Nagaraja, A.S., Miyake, T.M., Rupaimoole, R., Pecot, C.V. *et al.* (2014) 2'-OMe-phosphorodithioate-modified siRNAs show increased loading into the RISC complex and enhanced anti-tumor activity. *Nat. Commun.*, **5**, 3459.
2. Yang, X., Sierant, M., Janicka, M., Peczek, L., Martinez, C., Hassell, T., Li, N., Li, X., Wang, T. and Nawrot, B. (2012) Gene silencing activity of siRNA molecules containing phosphorodithioate substitutions. *ACS Chem. Biol.*, **7**, 1214-1220.
3. Lou, X., Egli, M. and Yang, X. (2016) Determining functional aptamer-protein interaction by biolayer interferometry. *Curr. Protoc. Nucleic Acid Chem.*, **67**, 7.25.1-7.25.15.
